# Supplementary material
Source: PubMed Central journal article supplement (PMC4678052)
Supplement: 10-1055-s-0035-1558094-sup_gf957.pdf [file 10-1055-s-0035-1558094-sup_gf957.pdf]

# Renaissance des transzervikalen Ballonkatheters zur Zervixreifung und Geburtseinleitung

## The Renaissance of Transcervical Balloon Catheters for Cervical Ripening and Labour Induction

### Autoren

W. Rath<sup>1</sup>, S. Kehl<sup>2</sup>

### Institute

<sup>1</sup> Gynäkologie und Geburtshilfe, Medizinische Fakultät, Universitätsklinikum RWTH Aachen, Aachen

<sup>2</sup> Frauenklinik, Universitätsklinikum Erlangen, Erlangen

### Schlüsselwörter

- Geburtseinleitung
- Ballonkatheter
- Prostaglandine
- Effektivität
- Sicherheit

### Key words

- labour induction
- balloon catheter
- prostaglandins
- effectiveness
- safety

**eingereicht** 1.6.2015  
**revidiert** 7.7.2015  
**akzeptiert** 15.7.2015

### Bibliografie

**DOI** <http://dx.doi.org/10.1055/s-0035-1558094>  
 Geburtsh Frauenheilk 2015; 75: 1–11 © Georg Thieme  
 Verlag KG Stuttgart · New York ·  
 ISSN 0016-5751

### Korrespondenzadresse

**Prof. Dr. med. Werner Rath**  
 Gynäkologie und Geburtshilfe  
 Medizinische Fakultät  
 Universitätsklinikum  
 Wendlingweg 2  
 52074 Aachen  
[wrath@ukaachen.de](mailto:wrath@ukaachen.de)

### PD Dr. med. Sven Kehl

Frauenklinik  
 Universitätsklinikum Erlangen  
 Universitätsstraße 21–23  
 91054 Erlangen  
[sven.kehl@uk-erlangen.de](mailto:sven.kehl@uk-erlangen.de)

### Zusammenfassung

Angesichts steigender Raten in den Industrieländern ist die Frage nach effektiven und sicheren Methoden der Geburtseinleitung wieder in den Fokus des Interesses gelangt. Prostaglandine sind effektiv zur Zervixreifung und Weheninduktion, weisen aber auch in bis zu 20% der Fälle uterine Überstimulierungen mit und ohne fetale Herzfrequenzveränderungen auf. Eine Alternative ist der seit fast 50 Jahren zur Geburtseinleitung angewandte transzervikale Ballonkatheter, der – wie jährlich steigende Publikationszahlen zeigen – eine Renaissance erfahren hat. Ballonkatheter ermöglichen eine schonende Zervixreifung ohne uterine Überstimulierungen. Zur Verfügung stehen der Foley-Katheter (off-label use) und der für die Geburtseinleitung zugelassene Doppelballonkatheter, die so effektiv sind wie Prostaglandine, das Infektionsrisiko für Mutter und Kind nicht erhöhen und bei im Vergleich zu Prostaglandinen geringerem Überwachungsaufwand eine gute Akzeptanz bei den Schwangeren aufweisen. Nach frustrierender Geburtseinleitung mit Prostaglandinen sind Ballonkatheter eine vielversprechende Option, noch eine vaginale Geburt zu erreichen. Zur Weheninduktion/-verstärkung ist allerdings in bis zu 85% der Fälle Oxytocin intravenös erforderlich. Hinsichtlich der Effizienz weisen Ballonkatheter und vaginales PGE<sub>2</sub> sowie Misoprostol bei unreifer Zervix keine signifikanten Unterschiede auf, die Rate uteriner Überstimulierungen ist signifikant niedriger, der Oxytocinbedarf signifikant höher. Zunehmend häufiger wird der Ballonkatheter in Kombination oder sequenziell mit oralem/vaginalem Misoprostol eingesetzt, allerdings ist die Datenlage bisher unzureichend. Internationale Leitlinien empfehlen die Anwendung des Ballonkatheters zur Geburtseinleitung bei unreifer Zervix (auch nach vorangegangener Sectio caesarea) als Alternative zu

### Abstract

Due to rising rates of labour induction in industrialised countries, safe and effective methods of induction have once again become a focus of interest and research. Prostaglandins are effective for cervical ripening and induction of uterine contractions. They do, however, cause overstimulation of the uterus in up to 20% of cases, sometimes causing changes in fetal heart rate. Transcervical balloon catheters provide an alternative to prostaglandins for labour induction and have been used for this purpose for almost 50 years. This induction method has experienced a recent renaissance in clinical practice that is reflected in an annually rising number of publications on its use. Balloon catheters allow gentle ripening of the cervix without causing uterine overstimulation. The two catheters available are the Foley catheter (off-label use) and the double balloon catheter, which is licensed for use in induction of labour. Both are as effective as prostaglandins, and do not increase the risk of infection to mother or child. Catheter induction also requires less monitoring compared to prostaglandins resulting in improved patient satisfaction. Balloon catheters provide a useful and promising option to achieve vaginal delivery despite failed prostaglandin induction. Intravenous oxytocin is nevertheless required in up to 85% of cases for adequate induction/augmentation of contractions. Balloon catheters, vaginal PGE<sub>2</sub> and misoprostol are equally effective in the context of an unripe/unfavourable cervix, the rate of uterine hyperstimulation being significantly lower, and the need for oxytocin significantly higher for catheters. Balloon catheters are increasingly being used in combination or sequentially with oral/vaginal misoprostol, although there is currently inadequate published data on the subject. International guidelines recommend the use of balloon catheters for labour

Prostaglandinen, insbesondere dann, wenn diese nicht zur Verfügung stehen oder kontraindiziert sind.

## Einleitung

In den letzten 10 Jahren hat sich die Rate an Geburtseinleitungen in den Industrieländern nahezu verdoppelt und liegt bspw. in den Niederlanden bei 33% [1], in Deutschland 2013 bei 22%, davon erfolgte die Geburtseinleitung in über 98% der Fälle medikamentös [2].

Der Vorteil des Prostaglandin-E<sub>1</sub>-Analogons Misoprostol und des Prostaglandin-E<sub>2</sub> (PGE<sub>2</sub>) liegt in der hohen Effizienz (z. B. Rate vaginaler Geburten/24 h) bei unreifer Zervix (Bishop Score [BS] < 6) infolge des pharmakologischen Synergismus aus zervixreifender und myometriumstimulierender Wirkung [3]. Beide Wirkungen der Prostaglandine sind klinisch jedoch kaum (oder nicht) voneinander zu trennen. Der Nachteil der Prostaglandine besteht bspw. in der unterschiedlich hohen Rate (3–20%) uteriner Überstimulierungen mit und ohne fetale Herzfrequenzveränderungen und damit in dem potenziellen Risiko einer fetalen Hypoxie (z. B. bei intrauteriner Wachstumsrestriktion mit eingeschränkter Plazentareserve) [4].

Die Induktion uteriner Kontraktionen bei unreifer Zervix beschleunigt den Geburtsfortschritt nicht, belastet infolge wehenabhängiger uteriner Minderperfusion die fetoplazentare Einheit und reduziert die Akzeptanz der Methoden bei der Schwangeren (z. B. durch schmerzhafte Wehen). Wie vor Kurzem aus einem Kommentar im Lancet hervorging, bevorzugen zunehmend mehr Geburtshelfer die Strategie, erst bei einer ausreichenden Zervixreifung mit der Weheninduktion zu beginnen [5].

Im Fokus des Interesses standen daher in den letzten Jahren einerseits NO-Donatoren und andererseits mechanische Methoden (Ballonkatheter und Zervixdilatoren wie Lamicel oder Dilapan-S) der Geburtseinleitung (Übersichten bei [6–8]). NO-Donatoren werden derzeit infolge der unzureichenden Datenlage in internationalen Leitlinien nicht empfohlen.

Mit der transzervikalen Einlage von Ballonkathetern wird eine Zervixreifung ohne Auslösung signifikanter uteriner Kontraktionen und ohne systemische mütterliche Nebenwirkungen erreicht [7,8]. Dementsprechend ist der Überwachungsaufwand im Vergleich zur Anwendung von Prostaglandinen deutlich geringer.

Als Mechanismus dieser Zervixreifung wurde eine durch mechanische Dehnung induzierte gesteigerte Freisetzung endogener Prostaglandine (z. B. aus Myometrium- und Amnionzellen) diskutiert [9]. Eine aktuelle prospektive Studie weist auf eine lokale inflammatorische Reaktion als Auslöser der Zervixreifung mit dem Ballonkatheter hin, dabei zeigten immunhistochemische Untersuchungen eine signifikante Erhöhung von Interleukin-6 und -8, Metalloproteinase-8, Hyaluronsäure-Synthetase und NO-Synthetase im Zervixgewebe nach Balloneinlage [10].

Bereits in den 80er-Jahren des 19. Jahrhunderts wurden Ballonkatheter zur Geburtseinleitung eingesetzt und 1967 von Embrey und Mollison in Kombination mit der extraamniotischen Applikation von Prostaglandin wiederentdeckt (Übersicht bei [11]). Seitdem wurden weltweit zahlreiche Studien vor allem mit dem Foley-Katheter zur Geburtseinleitung durchgeführt.

Mit dem 1990 von Atad entwickelten Doppelballonkatheter wurde die Erwartung verbunden, durch simultanen Druck auf den äußeren und inneren Muttermund die zervixreifende Wirkung im Vergleich zum Einzelballon noch zu verbessern. Der Doppel-

induction with an unripe cervix (also following previous caesarean section) as an alternative to prostaglandins, particularly when these are not available or are contraindicated.

ballonkatheter ist zur Zervixreifung (Geburtseinleitung) zugelassen und kommerziell verfügbar, die Liegezeit beträgt bis zu 12 h. Kontraindikationen sind u. a. die aktuelle oder geplante Applikation von Prostaglandinen und die tiefsitzende Plazenta/Placenta praevia. Wichtig ist der Warnhinweis der Herstellerfirma, dass nach Sectio caesarea mit isthmischem Querschnitt die Sicherheit und Wirksamkeit des Doppelballonkatheters zur Zervixreifung nicht nachgewiesen ist. Nach Angaben der Herstellerfirma ist er daher zur Geburtseinleitung nach vorangegangenem Kaiserschnitt kontraindiziert. Diese Problematik ist Gegenstand einer folgenden, eigenständigen Publikation der Autoren und soll daher hier nicht diskutiert werden.

Die Expulsion des Doppelballonkatheters erfolgt meist bei einer Muttermundweite von ca. 4 cm.

In den letzten Jahren kam es zu einer regelrechten Renaissance der Geburtseinleitung mit Ballonkathetern: Fast zwei Drittel der Publikationen der letzten 15 Jahre hierüber wurden in den letzten 5 Jahren veröffentlicht. Insbesondere Kombinationen von medikamentösen und mechanischen Methoden wurden untersucht.

Diese Übersichtsarbeit soll daher einen Überblick über den aktuellen Stand der Kenntnisse über die Geburtseinleitung mit Ballonkathetern liefern.

## Studien zur praxisbezogenen Anwendung

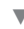

### Vergleich Foley-Katheter vs. Doppelballonkatheter

Hierzu liegen 4 randomisierte Studien mit teils widersprüchlichen Ergebnissen vor [12–15] (● Tab. 1). In 3 Studien zeigten sich signifikante Vorteile zugunsten des Foley-Katheters [12, 14, 15], in 2 weiteren konnte eine höhere Effektivität mit dem Doppelballonkatheter erreicht werden [13, 16]. Ein signifikanter Unterschied zwischen den beiden Ballonkathetern kann unter Berücksichtigung aller vorliegenden Daten nicht nachgewiesen werden. Einheitlich wird in den Studien auf die höhere Kosteneffektivität des Foley-Katheters im Vergleich zum Doppelballonkatheter hingewiesen, eindeutiger Vorteil des Doppelballons ist aber seine Zulassung zur Geburtseinleitung.

### Ballonfüllung

Die Füllung des Doppelballons beträgt bis zu 80 ml. Gegenstand verschiedener Studien war die Effizienz unterschiedlicher Füllungsvolumina beim Foley-Katheter. Drei randomisierte Studien verglichen ein Füllvolumen von 30 ml mit 60 ml [17] und 80 ml [18, 19] (● Tab. 2). In einer vor Kurzem publizierten systematischen Übersicht und Metaanalyse von Berndt et al. [20] wurden diese 3 Studien eingeschlossen. Insgesamt zeigte sich zwar kein signifikanter Unterschied hinsichtlich der Sectorate (RR 0,82; 95%-KI 0,48–1,41), jedoch war die Wahrscheinlichkeit eines reifen Zervixbefunds, der unterschiedlich definiert wurde, mit größeren Füllungsvolumina höher (RR 1,72; 95%-KI 1,46–2,04). Signifikant geringer war außerdem die Rate an ausbleibenden Geburten innerhalb von 24 h (RR 0,70; 95%-KI 0,54–0,90). Ob der Zug am Foley-Katheter (Füllungsvolumen 30 ml, Belastung mit 1000 ml Flüssigkeitsbeutel) die Eröffnungsperiode beeinflusst, war Gegenstand einer weiteren randomisierten Studie

**Tab. 1** Randomisierte, kontrollierte Studien zum Vergleich: Foley- vs. Doppelballonkatheter.

| Erst-<br>autor     | Jahr  | n                   | Foley-Katheter (F)                                                              | Doppelballon-<br>katheter (DB)                       | signifikante Ergebnisse                                                                        |           |
|--------------------|-------|---------------------|---------------------------------------------------------------------------------|------------------------------------------------------|------------------------------------------------------------------------------------------------|-----------|
| Pennell<br>CE [12] | 2009  | 320<br>(Nulliparae) | Füllungsvolumen: 30 ml<br>Liegezeit 12 h                                        | 80 ml<br>12 h oder PGE <sub>2</sub> -<br>Vaginalgel  | Einleitung-Geburt-Intervall (h, Median)<br>F: 23,2<br>DB: 24,5<br>PGE <sub>2</sub> : 23,8      | p = 0,043 |
|                    |       |                     |                                                                                 |                                                      | Schmerzempfinden (Schmerzscore $\geq 4$ ) (%)<br>F: 36<br>DB: 55<br>PGE <sub>2</sub> : 63      | p < 0,001 |
| Solt I [13]        | 2009* | 200                 | kA                                                                              | kA                                                   | Sectionrate bei Nulliparae (%)<br>F: 40<br>DB: 20                                              | p = 0,02  |
|                    |       |                     |                                                                                 |                                                      | Zeitintervall Entfernung des Ballons – Geburt (Nulliparae) (h)<br>F: 22,6<br>DB: 14,6          | p = 0,05  |
|                    |       |                     |                                                                                 |                                                      | Bishop-Score nach Entfernung des Ballons (Nulliparae)<br>F: 3,4 $\pm$ 2,0<br>DB: 4,4 $\pm$ 1,9 | p = 0,02  |
| Salim R<br>[14]    | 2011  | 293                 | Füllungsvolumen: 60 ml<br>Liegezeit 12 h                                        | 80 ml<br>12 h                                        | Rate an Vakuumextraktionen oder Sectiones (%)<br>F: 14,4<br>DB: 25,7                           | p = 0,02  |
| Mei-Dan<br>E [15]  | 2012  | 188                 | Füllungsvolumen: 30 ml<br>Liegezeit 12 h<br>+ extraamniotisches NaCl<br>50 ml/h | 80 ml<br>12 h                                        | Intervall Balloneinlage bis Expulsion (h)<br>F: 6,9 $\pm$ 4,2<br>DB: 10,1 $\pm$ 4,7            | p = 0,001 |
|                    |       |                     |                                                                                 |                                                      | Einleitung-Geburt-Intervall (h)<br>F: 19,6 $\pm$ 11,4<br>DB: 23,4 $\pm$ 15,5                   | p = 0,03  |
| Mei-Dan<br>E [16]  | 2014  | 186                 | Füllungsvolumen: 30 ml<br>+ extraamniotisches NaCl<br>50 ml/h<br>Liegezeit 12 h | 80 ml<br>+ extraamniotisches NaCl<br>50 ml/h<br>12 h | Sectionrate (%)<br>F: 20<br>DB: 8,3                                                            | p = 0,05  |
|                    |       |                     |                                                                                 |                                                      | Einleitung-Geburt-Intervall (h, Median)<br>F: 15,8<br>DB: 14,3                                 | p = 0,04  |

\* nur als Abstract publiziert; kA = keine Angabe

**Tab. 2** Randomisierte kontrollierte Studien: Vergleich unterschiedlicher Füllungsvolumina.

| Erst-<br>autor      | Jahr | n   | Standard-Füllungs-<br>volumen (SF) | größeres Füllungs-<br>volumen (GR) | signifikante Ergebnisse                                                     |           |
|---------------------|------|-----|------------------------------------|------------------------------------|-----------------------------------------------------------------------------|-----------|
| Levy R<br>[18]      | 2004 | 203 | 30 ml                              | 80 ml                              | Zervixdilatation $\geq 3$ cm zur Zervixreifeung (%)<br>SF: 52,4<br>GF: 76,0 | p < 0,001 |
|                     |      |     |                                    |                                    | vaginale Geburten/24 h Nullipara (%)<br>SF: 49,0<br>GF: 71,4                | p < 0,05  |
|                     |      |     |                                    |                                    | Wehenverstärkung mit Oxytocin Nullipara (%)<br>SF: 90,4<br>GF: 69,3         | p < 0,05  |
| Kashanian M<br>[19] | 2009 | 270 | 30 ml mit Traktion                 | 80 ml ohne Traktion                | Bishop-Score $\geq 9$ (%)<br>SF: 38,9<br>GF: 83,3                           | p < 0,001 |
|                     |      |     |                                    |                                    | vaginale Geburten (%)<br>SF: 83,3<br>GF: 90,0                               | p < 0,001 |
| Delaney S<br>[17]   | 2010 | 192 | 30 ml                              | 60 ml                              | vaginale Geburten/24 h (%)<br>SF: 14,0<br>GF: 26,0                          | p < 0,04  |
|                     |      |     |                                    |                                    | Zervixdilatation bei Expulsion des Ballons<br>SF: 3 cm<br>GF: 4 cm          | p < 0,01  |

**Tab. 3** Geburtseinleitung: Foley-Katheter vs. vaginales PGE<sub>2</sub>-Gel: PROBAAT-Studie (randomisierte, kontrollierte Multicenterstudie, n = 824) [28].

| Kriterien (auszugsweise)                                                                   | 0,5 mg PGE <sub>2</sub> -Vaginalgel<br>(n = 408) | Foley-Katheter<br>(n = 412) | p-Wert   |
|--------------------------------------------------------------------------------------------|--------------------------------------------------|-----------------------------|----------|
| Sectionrate (%)                                                                            | 20                                               | 23                          | NS       |
| Sectio infolge Geburtsstillstand in der Eröffnungsperiode (%)                              | 8                                                | 12                          | 0,021    |
| operative Entbindungen infolge „fetal distress“ (%)                                        | 18                                               | 12                          | 0,0218   |
| Induktions-Geburts-Intervall (median, h)                                                   | 18                                               | 29                          | < 0,0001 |
| Oxytocin zur Wehenverstärkung (%)                                                          | 59                                               | 86                          | < 0,0001 |
| uterine Hyperstimulationen (Tachysystolien/Dauerkontraktionen > 3 min) (%)                 | 3                                                | 2                           | NS       |
| Uterusruptur/Perforation (n)                                                               | 2                                                | 0                           | NS       |
| Verdacht auf mütterliche Infektion (Fieber intrapartum und Beginn der Antibiotikagabe) (%) | 3                                                | 1                           | 0,035    |
| Verlegung in die Neonatologie (%)                                                          | 20                                               | 12                          | 0,0019   |

NS = nicht signifikant

(n = 60); dabei ergab sich eine signifikante Verkürzung der Eröffnungsperiode um ca. 3 h zugunsten des belasteten Foley-Katheters ohne Erhöhung der Schmerzperzeptionsrate nach der Balloneinlage [21]. In der bereits zitierten Studie von Kashanian et al. [19] erbrachte die Traktion mit einem 500-ml-Gewicht keinen Vorteil (► **Tab. 2**).

### Anwendung bei vorzeitigem Blasensprung

Bei vorzeitigem Blasensprung werden Ballonkatheter entweder nicht eingesetzt oder entfernt oder die Zervixreifungsphase bei liegendem Katheter auf 12 h begrenzt [8]. Eine 2014 publizierte retrospektive Beobachtungsstudie verglich bei 122 Schwangeren mit vorzeitigem Blasensprung  $\geq 36$  SSW den Foley-Katheter (Füllungsvolumen 30 ml) mit der vaginalen Applikation von 25 µg Misoprostol alle 4 h oder 50 µg alle 6 h [22]; dabei ergab sich eine signifikante Verkürzung des medianen Induktion-Geburt-Intervalls mit dem Foley-Katheter (736 vs. 1354 min) bei allerdings signifikant höherem Verbrauch von Oxytocin zur Wehenverstärkung im Vergleich zu Misoprostol und vergleichbaren Sectionraten (36,3 vs. 39,4%). Die Häufigkeit von Chorioamnionitis (definiert als intrapartales Fieber mit Notwendigkeit zur Antibiotikagabe oder pathologisch-anatomischem Hinweis auf Chorioamnionitis) war bei Schwangeren mit Foley-Katheter signifikant niedriger (11,5%) als mit vaginalem Misoprostol (27,3%); dabei ist zu berücksichtigen, dass bekanntermaßen häufige vaginale Manipulationen das Infektionsrisiko erhöhen.

Nach einer aktuellen retrospektiven Kohortenstudie bei 129 Schwangeren mit vorzeitigem Blasensprung in Terminnähe lag die Rate an Chorioamnionitis (in der Publikation nicht definiert) mit dem Foley-Katheter mit 30,2% nicht signifikant höher als mit intravenösem Oxytocin/vaginalem Misoprostol mit 16,3% (p = 0,066), in der multivariaten Regressionsanalyse erwiesen sich die doppelt so hohen Anteile an Nulliparae und an intrauterinen Druckmessungen bei Schwangeren mit Foley-Kathetern als unabhängige Risikofaktoren für die Chorioamnionitis, nicht aber die Methode der Geburtseinleitung [23].

Derzeit wird in einer randomisierten Multicenterstudie (FOLCROM-Trial) die Anwendung des Foley-Katheters bei vorzeitigem Blasensprung in Terminnähe untersucht [24].

### Infektionsrisiko

Ob sich durch das Einführen eines „Fremdkörpers“ in den Uterus das Infektionsrisiko erhöht, ist Gegenstand kontroverser Diskussionen. Erstaunlich ist, wie unzureichend und widersprüchlich die Datenlage zu diesem Problem ist. So erwähnen aktuelle Übersichtsarbeiten das Infektionsrisiko gar nicht [6, 7] oder beziehen

sich auf 2 nachfolgend dargestellte Metaanalysen. Nach einer aktuellen Evaluation der Literatur soll bisher über keinen Fall einer schweren Infektion oder Sepsis im Zusammenhang mit dem Ballonkatheter zur Geburtseinleitung berichtet worden sein; in diesem Zusammenhang wird darauf hingewiesen, dass in bisherigen Studien fast ausschließlich Schwangere mit intakter Fruchtblase aufgenommen wurden [8].

Die Metaanalyse von Heinemann et al. 2008 [25] erbrachte unter Einbeziehung von 30 randomisierten kontrollierten Studien (n = 4468) beim Vergleich des Foley-Katheters mit medikamentösen Methoden der Geburtseinleitung eine signifikante Erhöhung mütterlicher Infektionen, definiert als Fieber, Endomyometritis oder Chorioamnionitis mit 7,6 vs. 5,0% (gepoolte OR: 1,50; 95%-KI 1,07–2,09); signifikant erhöht war die Rate an Chorioamnionitis (7,6 vs. 3,7%, gepoolte OR: 2,05; 95%-KI 1,22–3,44), nicht signifikant erhöht die an Endomyometritis mit 5,1 vs. 3,2% (gepoolte OR: 1,42; 95%-KI 0,74–2,97). Randomisierte Studien, ob durch eine prophylaktische Antibiotikagabe das mütterliche Infektionsrisiko gesenkt werden kann, liegen bisher nicht vor.

Die Cochrane-Analyse 2012 (33 Studien mit Foley-Katheter) kam zu dem Ergebnis, dass bei „limitierter Datenlage“ und unterschiedlichen Kriterien hinsichtlich der infektiösen Morbidität in Studien keine Evidenz für ein erhöhtes Infektionsrisiko nach Anwendung von Ballonkathetern besteht, die Autoren weisen allerdings darauf hin, dass die diesbez. Ergebnisse mit Vorsicht zu interpretieren sind [26].

Eine detaillierte Analyse der einbezogenen Studien bez. der infektiösen Morbidität wurde allerdings in der Cochrane-Analyse nicht durchgeführt.

Interessanterweise konnte vor Kurzem im Rahmen einer niederländischen Multicenterstudie gezeigt werden, dass sich durch die Einlage eines intrauterinen Druckkatheters im Vergleich zur externen Tokometrie das mütterliche Infektionsrisiko bis 3 Wochen post partum nicht erhöht (8,8 vs. 10,4% [27]).

In einer weiteren großen niederländischen randomisierten Multicenterstudie (n = 824) wurde der Foley-Katheter mit vaginalem PGE<sub>2</sub>-Gel verglichen [28]. Der Verdacht auf eine intrapartale Infektion (Körpertemperatur  $\geq 38^\circ\text{C}$  und Beginn einer Breitband-Antibiose) wurde beim Foley-Katheter in 1% und mit vaginalem PGE<sub>2</sub> in 3% der Fälle gestellt (p = 0,035), die Rate postpartaler Verlegungen des Kindes in die Neonatologie war nach PGE<sub>2</sub> signifikant höher als nach dem Ballonkatheter (20 vs. 12%, p = 0,002, ► **Tab. 3**).

Zusammenfassend ist davon auszugehen, dass die Einlage von Ballonkathetern vor allem im Vergleich zu wiederholten vagina-

len Prostaglandin-Applikationen nicht mit einer Erhöhung des Infektionsrisikos einhergeht.

### Anwendung bei Prostaglandin/Misoprostol-Versagern

Ungeachtet unterschiedlicher Definitionen, was unter dem Begriff „Einleitungsversager“ zu verstehen ist [26,29,30], ist die Anwendung eines Ballonkatheters eine vielversprechende Option, allerdings ist die Datenlage unzureichend. Nach Versagen der 3-mg-PGE<sub>2</sub>-Vaginaltablette (keine muttermundwirksamen Wehen nach 2–3 Applikationen) konnte mit dem Foley-Katheter noch in 75% der Fälle eine vaginale Geburt erreicht werden [31], nach Versagen von 50 µg vaginalen Misoprostol – appliziert alle 6 h bei unreifer Zervix (keine muttermundwirksamen Wehen nach 24 h) – führte die Anwendung des Foley-Katheters bei 93 von 112 Schwangeren (83%) zur vaginalen Geburt [32].

Nach unserer Auffassung sollte Schwangeren, die bei frustrierender Einleitung mit Prostaglandinen weiterhin eine vaginale Geburt wünschen, die Fortsetzung der Geburtseinleitung mit einem Ballonkatheter angeboten werden. Diese Entscheidung sollte nach individueller Risiko-Nutzen-Abwägung im Konsens mit der Schwangeren getroffen werden.

### Akzeptanz der Methoden

Weder in aktuellen Übersichtsarbeiten/Metaanalysen [7,8,26,33,34] noch in aktuellen Leitlinien wird die Akzeptanz/Patientenzufriedenheit der Geburtseinleitung mit Ballonkathetern vs. medikamentöse Verfahren thematisiert, in der Cochrane-Analyse 2012 [22] lediglich die bereits erwähnte randomisierte Studie von Penell et al. 2009 [12], nach der keine signifikanten Unterschiede in der Gesamtzufriedenheit der Schwangeren zwischen der Geburtseinleitung mit Foley-, und Doppelballonkatheter sowie PGE<sub>2</sub>-Vaginalgel bestand.

Zu vergleichbaren Ergebnissen kam jetzt auch eine Vergleichsstudie zwischen Doppelballonkatheter und dem 10-mg-PGE<sub>2</sub>-Vaginalinsert zur Geburtseinleitung bei Oligohydramnion am Termin, in der die Einlage des Ballons zwar als signifikant unangenehmer beschrieben wurde als die des Vaginalinserts, die Zufriedenheit der Schwangeren mit beiden Methoden allerdings nicht signifikant unterschiedlich war [35].

Die Patientinnenzufriedenheit war Gegenstand einer prospektiven und randomisierten Studie bei 122 Schwangeren, in der die Geburtseinleitung mit oralem Misoprostol vs. Doppelballonkatheter kombiniert mit oralem Misoprostol verglichen wurde [36]. Kernaussagen dieser Studie waren: Es ergaben sich keine signifikanten Unterschiede in der Zufriedenheit der Schwangeren zwischen beiden Methoden, die Patientinnen fühlten sich weder durch die Platzierung noch durch das Liegen des Doppelballonkatheters belastet. Signifikant mehr Frauen der Kombinationsgruppe würden die gleiche Methode in der Folgeschwangerschaft wieder bevorzugen oder sie anderen Schwangeren empfehlen. Das Geburtserleben, verifiziert mit einem standardisierten Fragebogen zur Erfassung postpartaler Befindlichkeitsstörungen und einem Summenscore zum Geburtserleben (Salmon's Item List), war in beiden Gruppen positiv, allerdings bei Schwangeren mit Kombination aus Doppelballon und Misoprostol signifikant besser als nach Misoprostol allein.

Nach einer vorab publizierten Studie aus Israel [37] ist die Patientinnenzufriedenheit (ermittelt anhand einer 10-Punkte-Skala) bei adipösen (Body-Mass-Index > 30) signifikant geringer als bei normgewichtigen Schwangeren (BMI ≤ 30, 5,95 ± 3,14 vs. 7,85 ± 2,7; p = 0,009).

**Tab. 4** Geburtseinleitung: Ballonkatheter vs. Prostaglandine (Prostaglandin E<sub>2</sub>, Misoprostol), Ergebnisse einer Cochrane-Analyse 2012 [26].

- ▶ tendenziell höhere Rate, innerhalb von 24 h keine vaginale Geburt zu erreichen: 48 vs. 38% (RR 1,26; 95%-KI 0,94–1,68)
- ▶ keine signifikanten Unterschiede in der Sektiorate: 27 vs. 25% (RR 1,01; 95%-KI 0,90–1,13)
- ▶ keine signifikanten Unterschiede in Zervixreifung (unreife Zervix nach 12–24 h) 37 vs. 39% (RR 0,96; 95%-KI 0,70–1,34)
- ▶ signifikant höhere Rate an Schwangeren mit Notwendigkeit zur Wehenverstärkung durch Oxytocin: 75 vs. 80% (RR 1,51; 95%-KI 1,15–1,97)
- ▶ signifikant niedrigere Rate uteriner Überstimulierungen mit fetalen Herzfrequenzveränderungen: 0,4 vs. 3% (RR 0,19; 95%-KI 0,08–0,43)

Joziak M et al. Cochrane Database Syst Rev 2012; 3: CD001233, vergleichbare Ergebnisse auch bei: Vaknin Z et al. AJOG 2010 (Metaanalyse [43])

Der Nachholbedarf für dieses wichtige Kriterium der Geburtseinleitung mit Ballonkathetern im Vergleich zu anderen Methoden wurde inzwischen erkannt und ist Bestandteil zweier aktueller, laufender randomisierter Studien (orales Misoprostol vs. Foley-Katheter) in den Niederlanden [38] und den USA [39].

Von praxisbezogener Relevanz ist die Beobachtung, dass das Einlegen eines Foley-Katheters mittels Spekulum im Vergleich zu dessen digitaler Platzierung von Schwangeren signifikant häufiger als schmerzhaft (visuelle Analogskala) empfunden wird, allerdings ohne Einfluss auf die Gesamtzufriedenheit der Patientinnen mit der Methode [40].

### Vergleich Ballonkatheter vs. Prostaglandin-E<sub>2</sub>

▼ Zu berücksichtigen ist, dass Ballonkatheter allein nur in 15–33% der Fälle im Zuge der Zervixreifung zu geburtsauslösenden Wehen führen; bei 67–85% der Schwangeren wird Oxytocin intravenös (mehrheitlich appliziert mit der Einlage des Ballons oder nach dessen Expulsion, unterschiedliche Oxytocin-Dosierungen) zur Wehenverstärkung benötigt [41,42].

Beim Vergleich der Geburtseinleitung mit Ballonkathetern vs. Prostaglandine bezogen sich bisherige Studien/Metaanalysen fast ausschließlich auf den Foley-Katheter mit unterschiedlichen Füllungsvolumina.

Eine Übersicht zu den Ergebnissen Ballonkatheter vs. Prostaglandine (PGE<sub>2</sub> und Misoprostol) lieferte eine jüngste Cochrane-Analyse unter Einschluss von 23 randomisierten Studien [26] (● **Tab. 4**), die im Wesentlichen mit einer bereits 2010 durchgeführten Metaanalyse übereinstimmen [43]. Die Ergebnisse dieser Metaanalyse von Vaknin et al. [43] sowie die von 2 später publizierten randomisierten und kontrollierten Studien [12,44] veranlassten Henderson et al. 2011 [45] zu der Schlussfolgerung, dass bei Nulli- und Multiparae mit unreifer Zervix transzervikale Ballonkatheter hinsichtlich der Sicherheit, der Kosten, der Patientinnenzufriedenheit und der Wehendauer der Anwendung von PGE<sub>2</sub> zur Geburtseinleitung vorzuziehen sind.

### Ballonkatheter vs. PGE<sub>2</sub>-Vaginalgel

In der bisher größten randomisierten, kontrollierten Studie (PROBAAT-Trial) wurde bei 824 Schwangeren mit unreifer Zervix (BS < 6) die Geburtseinleitung mit dem Foley-Katheter (Füllungsvolumen 30 ml, bei Expulsion oder BS > 6 Amniotomie und intravenöses Oxytocin je nach Uterusaktivität) vs. PGE<sub>2</sub>-Vaginalgel (1 mg initial, wiederholt nach 6 h, 2 Applikationen/d, bei Nulliparae initial 2 mg) vergleichend untersucht [28]. Die Ergebnisse die-

**Tab. 5** Randomisierte, kontrollierte Studien: Ballonkatheter vs. PGE<sub>2</sub>-Vaginalinsert.

| Erst-<br>autor      | Jahr | n   | Ballonkatheter                                                          | 10-mg-PGE <sub>2</sub> -<br>Vaginalinsert | signifikante Ergebnisse                                                                        |            |
|---------------------|------|-----|-------------------------------------------------------------------------|-------------------------------------------|------------------------------------------------------------------------------------------------|------------|
| Cromi A<br>[47]     | 2011 | 397 | Foley (F)<br>Füllungsvolumen: 50 ml<br>Liegezeit:<br>A: 24 h<br>B: 12 h | 24 h                                      | vaginale Geburten/24 h (%)<br>Foley A: 21,0<br>Foley B: 59,8<br>PGE <sub>2</sub> : 48,5        | p = 0,0001 |
|                     |      |     |                                                                         |                                           | Oxytocin zur Wehenverstärkung (%)<br>Foley A: 81,2<br>Foley B: 81,8<br>PGE <sub>2</sub> : 53,8 | p = 0,05   |
| Cromi A<br>[41]     | 2012 | 208 | Doppelballon (DB)<br>Füllungsvolumen: 80 ml<br>Liegezeit: 12 h          | 24 h                                      | vaginale Geburten/24 h (%)<br>DB: 68,6<br>PGE <sub>2</sub> : 49,5                              | p = 0,007  |
|                     |      |     |                                                                         |                                           | Oxytocin zur Wehenverstärkung (%)<br>DB: 85,7<br>PGE <sub>2</sub> : 54,4                       | p < 0,0001 |
|                     |      |     |                                                                         |                                           | uterine Überstimulierungen (%)<br>DB: 0<br>PGE <sub>2</sub> : 9,7                              | p < 0,0007 |
| Du C [42]           | 2014 | 155 | Doppelballon (DB)<br>Füllungsvolumen: 80 ml<br>Liegezeit: 12 h          | 24 h                                      | Oxytocin zur Wehenverstärkung (%)<br>DB: 75<br>PGE <sub>2</sub> : 53,2                         | p < 0,001  |
|                     |      |     |                                                                         |                                           | uterine Überstimulierungen (%)<br>DB: 0<br>PGE <sub>2</sub> : 10,1                             | p < 0,007  |
| Suffecool<br>K [49] | 2014 | 62  | Doppelballon (DB)<br>Füllungsvolumen: 80 ml<br>Liegezeit: 12 h          | 12 h                                      | IEinleitung-Geburt-Intervall (h)<br>DB: 19,1 ± 5,0<br>PGE <sub>2</sub> : 24,4 ± 8,7            | p = 0,05   |
|                     |      |     |                                                                         |                                           | vaginale Geburten/24 h (%)<br>DB: 87,1<br>PGE <sub>2</sub> : 47,4                              | p = 0,002  |

ser Studie gehen aus **Tab. 3** hervor. Unter deren Einbeziehung in eine Metaanalyse, die allerdings nur aus 2 weiteren aktuellen randomisierten Studien mit PGE<sub>2</sub>-Vaginalgel als Vergleichsgruppe bestand [12,44], kamen die Autoren zu folgenden Schlussfolgerungen:

- ▶ Keine signifikanten Unterschiede in der Sectiorate, mit Foley-Katheter allerdings häufigere Indikation zum Kaiserschnitt infolge Geburtsstillstands, andererseits niedrigere Sectiorate infolge „fetal distress“ mit dem Foley-Katheter.
- ▶ Längere Einleitung-Geburt-Intervalle mit dem Foley-Katheter im Vergleich zu PGE<sub>2</sub>, möglicherweise bedingt durch den verzögerten Beginn der Oxytocin-Gabe und/oder Durchführung der Amniotomie nach Expulsion des Katheters (z.B. während der Nachtstunden) (vgl. auch [7]).
- ▶ Signifikant niedrigere Rate an uterinen Überstimulierungen (RR 0,44; 95%-KI 0,21–0,9) in der Metaanalyse, nicht jedoch im PROBAAT-Trial (2 vs. 3%, p=0,36) mit dem Foley-Katheter ohne signifikanten Einfluss auf das neonatale Outcome (Apgar-Wert nach 5 Minuten, Nabelschnur-pH).

Als klinisch relevante Vorteile des Ballonkatheters gegenüber PGE<sub>2</sub> zur Geburtseinleitung bei unreifer Zervix werden unisono der geringere Überwachungsaufwand während der Zervixreifungsphase, die einfachere Lagerung bei Raumtemperatur und die geringeren Kosten genannt [6,7,24].

Die Ergebnisse einer jüngsten Kosteneffektivitätsanalyse aus den Daten der PROBAAT-Studie [46], die u.a. die Kosten für den Aufenthalt im Kreißsaal, für zusätzliche Medikamente und Regionalanästhesien, für die Methode selbst und für die Geburt einbezog, zeigen keine signifikanten Unterschiede hinsichtlich der Kosten

zwischen dem Foley-Katheter und der Anwendung von vaginalem PGE<sub>2</sub> zur Geburtseinleitung bei unreifer Zervix.

### Ballonkatheter vs. PGE<sub>2</sub>-Vaginalinsert

In 4 randomisierten Studien mit insges. 824 Schwangeren wurde der Foley- [47] und der Doppelballonkatheter [41,42,48] zur Geburtseinleitung bei unreifer Zervix (Bishop Score ≤6) mit dem 10 mg PGE<sub>2</sub>-Vaginalinsert (Liegezeit bis zu 24 h) vergleichend untersucht (**Tab. 5**). In der Studie von Cromi et al. 2011 [47] wurde der Foley-Katheter entweder über 12 h oder über 24 h belassen und bei dessen Expulsion oder Entfernung Oxytocin intravenös verabreicht. Keine signifikanten Unterschiede zwischen den Methoden ergaben sich für die Sectiorate und den zervikalen Reifungseffekt nach 12 und 24 h; signifikant niedriger war die Frequenz an uterinen Hyperstimulationen mit dem Foley-Katheter (0 vs. 6,1%). Die Rate vaginaler Geburten/24 h betrug nach Foley-Katheter mit Liegezeit über 24 h nur 21%, mit Liegezeit über 12 h 59,5% und mit dem PGE<sub>2</sub>-Vaginalinsert 48,5% (p < 0,001), was für die klinische Praxis von Relevanz ist. Die beiden randomisierten prospektiven Vergleichsstudien zwischen dem Doppelballonkatheter und dem 10 mg PGE<sub>2</sub>-Vaginalinsert (Liegezeit bis zu 24 h) zeigten übereinstimmend keine signifikanten Unterschiede in der Sectiorate, einen signifikant höheren Bedarf an Oxytocin sowie eine geringere Frequenz an uterinen Überstimulierungen nach Anwendung des Doppelballonkatheters ohne Einfluss auf das neonatale Outcome. Unterschiedlich zwischen beiden Untersuchungsgruppen war die Rate vaginaler Geburten/24 h. Während in der Studie von Cromi et al. 2012 [41] mit dem Doppelballonkatheter eine signifikant höhere Rate vaginaler Ge-

**Tab. 6** Geburtseinleitung: Foley-Katheter vs. vaginales Misoprostol.

| <b>Metaanalyse 2014 (10 Studien, n = 1520)</b>                |                                                                                           |                                |               |
|---------------------------------------------------------------|-------------------------------------------------------------------------------------------|--------------------------------|---------------|
| signifikante Ergebnisse                                       | Oxytocin zur Weheninduktion/-verstärkung:                                                 | RR (95 %-KI) 1,74 (1,30–2,32)  |               |
|                                                               | uterine Überstimulierungen                                                                | RR (95 %-KI) 0,39 (0,26–0,60)  |               |
|                                                               | uterines Hyperstimulationssyndrom*                                                        | RR (95 %-KI) 0,39 (0,24–0,61)  |               |
| keine signifikanten Unterschiede                              | Sectionrate, postpartale Blutungen, Chorioamnionitis/Endomyometritis, 5-Minuten-Apgar < 7 |                                |               |
| <b>PROBAAT-M-Studie (n = 56)</b>                              | <b>25 µg Misoprostol (n = 64)</b>                                                         | <b>Foley-Katheter (n = 65)</b> | <b>p-Wert</b> |
| Sectionrate (%)                                               | 17                                                                                        | 25                             | 0,29          |
| Seccio infolge Geburtsstillstand in der Eröffnungsperiode (%) | 3                                                                                         | 14                             | 0,03          |
| Induktion-Geburt-Intervall (median, h)                        | 25                                                                                        | 36                             | < 0,001       |
| Oxytocin zur Wehenverstärkung (%)                             | 50                                                                                        | 82                             | < 0,001       |
| uterine Überstimulierungen (%)                                | 2                                                                                         | 4                              | 0,59          |
| arterieller NS-pH < 7,10 (%)                                  | 9                                                                                         | 10                             | 1,00          |

Jozwiak M et al. Am J Perinatol 2014; 31: 145 [50]

\* uterine Überstimulierungen (Polysystolie und/oder Dauerkontraktion) mit pathologischem fetalen Herzfrequenzmuster

burten/24 h (68,6 vs. 49,5%) erreicht wurde, ergaben sich in der Studie von Du et al. 2014 [42] diesbez. keine signifikanten Unterschiede (50 vs. 53,2%).

In einer kürzlich erschienenen randomisierten Studie bei 62 Nulliparae mit unreifer Zervix (BS < 6) wurde der Doppelballonkatheter (Füllung: 80 ml, Liegezeit bis zu 12 h, Oxytocin intravenös 6 h nach Einlage des Katheters) mit der Applikation des 10-mg-PGE<sub>2</sub>-Vaginalinserts (Liegezeit bis zu 12 h) verglichen [48]. Die mittleren Einleitung-Geburt-Intervalle waren nach dem Doppelballonkatheter signifikant kürzer als mit dem PGE<sub>2</sub>-Vaginalinsert (17,9 vs. 26,7 h) und die Rate vaginaler Geburten/24 h signifikant höher (87,1 vs. 47,4%) bei vergleichbar hoher Sectionrate von 51,6 vs. 54,8% und keinen signifikanten Unterschieden im neonatalen Outcome. Die Häufigkeit an uterinen Hyperstimulationen betrug mit dem Doppelballonkatheter 0 und mit dem PGE<sub>2</sub>-Vaginalinsert 25,8%.

Der Verkürzung der Einleitung-Geburt-Intervalle kommt insofern Bedeutung zu, da sie eng mit der Zufriedenheit der Schwangeren mit dem Einleitungsverfahren assoziiert ist [49].

## Vergleich Ballonkatheter vs. Misoprostol

### Ballonkatheter vs. vaginales Misoprostol

In zahlreichen Studien wurde inzwischen auch der Einsatz des Foley-Katheters (Füllungsvolumen 30–50 ml) vs. der vaginalen Gabe von Misoprostol (25 µg alle 3–6 h) evaluiert, zusammengefasst in einer jüngsten Metaanalyse, die 10 randomisierte Studien (n = 1520) zwischen 2001 und 2012 einschloss [50]. Darüber hinaus liegen neuere Daten aus der PROBAAT-M-Studie 2014 vor [50] (◉ Tab. 6), in der 129 Schwangere (BS 0–5) entweder mit dem Foley-Katheter (Füllungsvolumen 30 ml) oder mit 25 µg vaginalem Misoprostol (alle 4 h bis max. 3 Dosierungen/24 h) behandelt wurden; ab einem Bishop Score ≥ 6 wurde die Amniotomie durchgeführt und Oxytocin intravenös appliziert mit Dosierungen je nach Wehentätigkeit. Die wesentlichen Unterschiede der Ergebnisse zwischen der Metaanalyse und der PROBAAT-M-Studie liegen in den längeren Einleitung-Geburt-Intervallen und der nicht signifikant höheren Rate uteriner Überstimulierungen nach Anwendung des Foley-Katheters; eine Erklärung dafür lieferten die Autoren nicht. Die Ergebnisse dieser Metaanalyse stehen im Wesentlichen in Übereinstimmung mit der von Fox et al. 2011 [33] publizierten (9 Studien, n = 1603), in die allerdings 4 Studien mit 50 µg vaginalem Misoprostol – appli-

ziert in 4- bis 6-stündlichen Intervallen – einbezogen wurden. Erstaunlich ist, dass sich hier die mittleren Einleitung-Geburt-Intervalle zwischen beiden Untersuchungsgruppen nicht signifikant unterschieden. Keine signifikanten Unterschiede fanden sich auch hinsichtlich der Häufigkeit an Chorioamnionitis (RR 1,13; 95 %-KI 0,61–2,09).

## Ballonkatheter vs. orales Misoprostol

Bisher liegen nur wenige Studien mit kleinen Fallzahlen zum Vergleich von Foley-Katheter und oralem Misoprostol zur Geburtseinleitung vor [51,52]. Der Vorteil der oralen Applikation von Misoprostol gegenüber der vaginalen ist bei vergleichbarer Dosierung die niedrigere Rate uteriner Überstimulierungen, das bessere neonatale Outcome (5-Minuten-Apgar < 7 [53]), die höhere Akzeptanz bei den Schwangeren und das geringere Infektionsrisiko durch Vermeidung vaginaler Manipulationen. Zurzeit liegen 2 Studienprotokolle vor, welche die Anwendung des Foley-Katheters (Füllungsvolumen 30 ml) mit der oralen Gabe von 50 µg (alle 4 h) bzw. 25 µg (alle 2 h) Misoprostol vergleichen sollen. Zielkriterien der einen Studie (PROBAAT-II-Studie [38]), geplant ist der Einschluss von 1860 Schwangeren, ist das neonatale Outcome (Nabelschnur-pH ≤ 7,05 oder 5-Minuten-Apgar-Wert < 7) und die Frequenz an postpartalen Blutungen (Blutverlust ≥ 1000 ml). Zielkriterium der anderen Studie bei Schwangeren mit Präeklampsie – geplant ist der Einschluss von 620 Schwangeren – die Rate vaginaler Geburten/24 h [39].

## Kombinierte/sequenzielle Anwendung von Ballonkatheter und anderen Uterotonika

Da Ballonkatheter zur Zervixreifung und mehrheitlich nicht zur Auslösung von Wehen führen, wurden sie mit zahlreichen anderen wehenstimulierenden Verfahren kombiniert.

Die gleichzeitige Applikation von niedrig dosiertem intravenösem Oxytocin mit der Einlage des Foley-Katheters erhöhte im Vergleich zum Foley-Katheter allein während der Zervixreifungsphase die Rate vaginaler Geburten/24 h nicht (46 vs. 45% [54]). Ebenso ergab die Anwendung von intravenösem Oxytocin in fixer vs. ansteigender Dosierung nach der Balloneinlage keine signifikanten Unterschiede hinsichtlich der medianen Induktion-Geburt-Intervalle (23,7 vs. 19,2 h) zwischen beiden Behandlungsgruppen [55].

**Tab. 7** Ballonkatheter plus Misoprostol vs. Misoprostol zur Geburtseinleitung bei unreifer Zervix. Ergebnisse aus aktuellen randomisierten, kontrollierten Studien.

| Autor, Jahr              | Zahl der Schwangeren (n) | Intervention                                                                   | Kontrolle                                    | signifikante Ergebnisse                                                                             |
|--------------------------|--------------------------|--------------------------------------------------------------------------------|----------------------------------------------|-----------------------------------------------------------------------------------------------------|
| Kehl et al. 2011 [57]    | 122                      | Doppelballonkatheter (bis 24 h) + 50 µg Misoprostol oral (evtl. bis zu 100 µg) | 50 µg Misoprostol oral (evtl. bis zu 100 µg) | Induktion-Geburt-Intervall (median): 15,3 vs. 20,8 h<br>Einleitungsversager: 9,3 vs. 21,2 %         |
| Ande et al. 2012 [61]    | 100                      | Foley-Katheter + 50 µg Misoprostol vaginal nach Kathetereinlage                | 50 µg Misoprostol vaginal (6 h)              | Rate vaginaler Geburten/12 h: 92,5 vs. 60 %<br>Sectorate: 20 vs. 40 %                               |
| Carbone et al. 2013 [58] | 123                      | Foley-Katheter + 25 µg Misoprostol vaginal (4 h)                               | 25 µg Misoprostol vaginal (4 h)              | Induktion-Geburt-Intervall (median): 15,3 vs. 18,3 h<br>Eröffnungsperiode (median): 13,7 vs. 17,1 h |
| Ugwu et al. 2013 [59]    | 150                      | Foley-Katheter + 25 µg Misoprostol vaginal (4 h)                               | 25 µg Misoprostol vaginal oder nur Foley     | Zervixreifungsphase um ca. 3 h verkürzt<br>Oxytocin: 40 vs. 17,5 vs. 25,6 %                         |
| Lanka et al. 2014 [60]   | 126                      | Foley-Katheter + 25 µg Misoprostol vaginal (4 h)                               | 25 µg Misoprostol vaginal (4 h)              | uterine Überstimulierungen: 7,9 vs. 39,7 %<br>mekoniumhaltiges Fruchtwasser: 6,3 vs. 27 %           |
| Kehl et al. 2015 [62]    | 326                      | Doppelballon, nach 24 h<br>50 µg Misoprostol oral (evtl. 100 µg)               | 50 µg Misoprostol oral (evtl. 100 µg)        | Induktion-Geburt-Intervall (median): 32,4 vs. 22,5 h<br>Gesamt-Misoprostolverbrauch: 100 vs. 200 µg |

### Kombination Ballonkatheter mit extraamniärer Kochsalz-Infusion (EASI)

Eine vergleichende Untersuchung zwischen dem Foley-Katheter mit extraamniärer Kochsalz-Infusion vs. Doppelballonkatheter allein zeigte signifikante Vorteile zugunsten der kombinierten Anwendung hinsichtlich einer Verkürzung des Intervalls zwischen Balloneinlage und dessen Expulsion sowie der Einleitung-Geburt-Intervalle [15]. In einer aktuellen Folgestudie der gleichen Arbeitsgruppe [16] wurden der Foley-Katheter und der Doppelballonkatheter in Kombination mit EASI evaluiert; die Ergebnisse beider Studien sind in **Tab. 1** zusammengefasst. Der Vergleich zwischen Doppelballonkatheter mit und ohne EASI erbrachte signifikante Vorteile zugunsten der kombinierten Vorgehensweise [56]: kürzere Intervalle zwischen Balloneinlage und Geburt (14,2 vs. 20,45 h,  $p < 0,001$ ) und eine höhere Expulsionsrate des Ballons (68,5 vs. 51 %,  $p = 0,04$ ).

### Simultane Verwendung von Ballonkathetern und Misoprostol

Aktuellere randomisierte Studien beschäftigten sich mit der Kombination aus Ballonkatheter und der Anwendung von Misoprostol vs. Misoprostol allein zur Geburtseinleitung, zusammengefasst in einer Cochrane-Analyse 2012 [26] unter Einschluss von 8 bis Januar 2012 publizierten Studien ( $n = 1295$ ). Danach führte die Kombination beider Methoden zu einer signifikanten Erhöhung der Rate vaginaler Geburten/24 h (RR 0,45; 95%-KI 0,25–0,71) ohne Einfluss auf die Sectorate und zu einer Verminderung der Frequenz uteriner Überstimulierungen (RR 0,59; 95%-KI 0,35–0,78); die Datenlage zur Häufigkeit uteriner Hyperstimulationssyndrome ist widersprüchlich. Die Ergebnisse aus randomisierten Studien ab 2012 sind in **Tab. 7** dargestellt.

In der prospektiven, randomisierten Studie von Kehl et al. [57] wurde bei 122 Schwangeren die Anwendung des Doppelballonkatheters (Liegezeit bis 24 h) kombiniert mit der oralen Gabe von 50 µg Misoprostol oral (wiederholt nach 4 und 8 h, sofern notwendig gesteigert auf 100 µg) mit der alleinigen oralen Applikation von Misoprostol verglichen. Primäres Zielkriterium dieser

Studie war das Versagen der Geburtseinleitung, definiert als keine vaginale Geburt innerhalb von 48 h. In der Kombinationsgruppe ergaben sich signifikant weniger Einleitungsversager als in der Kontrollgruppe (9,3 vs. 21,7 %,  $p = 0,07$ ) sowie eine signifikante Verkürzung der medianen Einleitung-Geburt-Intervalle (15,3 vs. 20,8 h).

In 3 weiteren randomisierten Studien der letzten beiden Jahre führte die Kombination von Foley-Katheter und vaginalem Misoprostol (25 µg alle 4 h) vs. vaginalem Misoprostol zu einer signifikanten Verkürzung der Einleitung-Geburt-Intervalle, zu einer signifikanten Reduktion uteriner Überstimulierungen und mekoniumhaltigen Fruchtwassers sowie zu einem signifikant verminderten Oxytocin-Bedarf im Vergleich zum Misoprostol allein [58–60]. Auch die Applikation von vaginalem Misoprostol 6 h nach Einlage des Foley-Katheters war effektiver als die der abschließlichen Anwendung von vaginalem Misoprostol [61] (**Tab. 7**).

Insgesamt lässt sich mit der Kombination aus Ballonkatheter und vaginalem Misoprostol eine Verminderung uteriner Überstimulierungen mit und ohne fetale Herzfrequenzveränderungen erreichen, keine signifikanten Unterschiede im Vergleich zur alleinigen Misoprostol-Anwendung ergaben sich hinsichtlich der Häufigkeit an Chorioamnionitis und im neonatalen Outcome. Allerdings ist die Datenlage infolge noch geringer Fallzahlen und erheblicher Heterogenität zwischen den Studien nicht ausreichend, um derzeit das kombinierte Vorgehen für die klinische Praxis zu empfehlen.

### Sequenzielle Verwendung von Ballonkathetern und Misoprostol

Bisher lagen keine Studien zur Anwendung des Doppelballonkatheters und der sequenziellen Gabe von oralem Misoprostol vor. Eine soeben publizierte, randomisierte und kontrollierte Multicenterstudie schloss 326 Schwangere mit unreifer Zervix und unterschiedlichen Indikationen zur Geburtseinleitung ein [62], die entweder mit dem Doppelballonkatheter (Liegezeit bis zu 12 h) 24 h nach der Einlage gefolgt von der oralen Gabe von 50 µg Misoprostol (Wiederholung nach 4 und 8 h, nach 24 h Do-

**Tab. 8** Vor- und Nachteile des Ballonkatheters im Vergleich zu Prostaglandin-E<sub>2</sub>/Misoprostol.

| Vorteile                                                                                                                                                                                                                                                                                                                                                                  | Nachteile                                                                                                                                                                                                                                                                     |
|---------------------------------------------------------------------------------------------------------------------------------------------------------------------------------------------------------------------------------------------------------------------------------------------------------------------------------------------------------------------------|-------------------------------------------------------------------------------------------------------------------------------------------------------------------------------------------------------------------------------------------------------------------------------|
| <ul style="list-style-type: none"> <li>▶ einmalige Applikation</li> <li>▶ keine uterinen Überstimulierungen/Hyperstimulationssyndrome<br/>→ geringeres Risiko für den Feten</li> <li>▶ geringerer Überwachungsaufwand</li> <li>▶ preisgünstiger im Vergleich zu Prostaglandin-E<sub>2</sub></li> <li>▶ keine spezielle Lagerung (z. B. Kühlkette) erforderlich</li> </ul> | <ul style="list-style-type: none"> <li>▶ höherer Bedarf an Oxytocin zur Wehenverstärkung</li> <li>▶ potenziell erhöhtes Risiko für infektiöse Morbidität im Vergleich zu oralem Prostaglandin</li> <li>▶ geringere Rate an vaginalen Geburten/24 h* bei Multiparae</li> </ul> |

\* Jozwiak M et al. Cochrane Database Syst Rev 2012; 8: CD001233 [26]

siserhöhung auf 100 µg möglich) oder mit oralem Misoprostol nach gleichem Dosierungsschema behandelt wurden. Primäre Zielkriterien der Studie war das Einleitung-Geburt-Intervall und die Rate vaginaler Geburten/48 h. Bei nichtsignifikant unterschiedlichen Sectoraten (21,6 vs. 29,8%) war das mediane Einleitung-Geburt-Intervall unabhängig von der Parität in der Kombinationsgruppe mit 32,4 h signifikant länger als nach alleiniger Anwendung von oralem Misoprostol mit 22,5 h ( $p = 0,004$ ); bei Differenzierung nach Erst- und Mehrgebärenden war dieser Unterschied allerdings statistisch nicht signifikant. Hinsichtlich der Rate vaginaler Geburten/48 h (79,5 vs. 84,9%) und des Verbrauchs an Oxytocin ergaben sich keine signifikanten Unterschiede, allerdings war die Zahl an Misoprostol-Applikationen und die Gesamtdosis an verbrauchtem Misoprostol in der Kombinationsgruppe signifikant geringer. Bei 23,3% der Schwangeren führte der Doppelballonkatheter allein zu geburtsauslösenden Wehen. Zu prüfen bleibt, ob die orale Applikation von Misoprostol unmittelbar nach Entfernen des Doppelballonkatheters zu besseren Ergebnissen führt.

### Stellungnahmen aus aktuellen Leitlinien

Laut WHO-Empfehlungen 2011 [63] ist der Ballonkatheter bei annähernd vergleichbarer Effizienz wie vaginale Prostaglandine (PGE<sub>2</sub>, Misoprostol) zur Geburtseinleitung zu empfehlen (mäßige Evidenz, hoher Empfehlungsgrad). Die Kombination von Ballonkatheter und Oxytocin wird als alternative Methode empfohlen, wenn Prostaglandine (einschließlich Misoprostol) nicht zur Verfügung stehen oder kontraindiziert sind (niedrige Evidenz, schwacher Empfehlungsgrad). Der Ballonkatheter wird als Option zur Geburtseinleitung nach vorangegangener Sectio caesarea angegeben (kein Empfehlungsgrad).

Nach der RCOG-Leitlinie 2008 (Update 2014 [64]) soll der Ballonkatheter nicht routinemäßig zur Geburtseinleitung bei unreifer Zervix eingesetzt und dessen Anwendung in künftigen Studien bei Schwangeren nach vorangegangener Sectio caesarea geprüft werden.

Die ACOG-Leitlinie 2009 [65] gibt im Sinne einer Grad-A-Empfehlung an, dass der Foley-Katheter eine vernünftige und effektive Alternative (im Vergleich zu Prostaglandinen) zur Zervixreifung/Geburtseinleitung darstellt und weist auf die Möglichkeit einer ambulanten Geburtseinleitung mit dieser Methode hin.

Die Kanadische Leitlinie (SOGC) 2013 [66] propagiert den Ballonkatheter als zulässige Methode zur Geburtseinleitung nach vorangegangener Sectio caesarea (I-B) und zur ambulanten Geburtseinleitung (II-B), als Second-Line-Option den Doppelballonkatheter (II-B). Hingewiesen wird in der Leitlinie auf den hohen Bedarf an Oxytocin und die niedrige Rate uteriner Tachysystolien ohne gesteigertes Risiko für mütterliche (Chorioamnionitis,

Endometritis) oder neonatale Infektionen bei Anwendung des Ballonkatheters.

Für Deutschland liegen keine diesbez. Empfehlungen in Leitlinien vor.

### Fazit

▼ Die Geburtseinleitung mit Ballonkathetern hat in den letzten Jahren eine Renaissance erfahren und findet sich vermehrt in internationalen Leitlinien wieder. Die vorliegenden Zahlen zeigen, dass hiermit ebenso wie mit den etablierten Prostaglandinen erfolgreich Geburten eingeleitet werden können. Die Vor- und Nachteile der Ballonkatheter im Vergleich zu Prostaglandinen sind in **Tab. 8** dargestellt.

Neben dem kostengünstigen Einzelballonkatheter (Foley-Katheter) stehen heutzutage Doppelballonkatheter, die zur Geburtseinleitung zugelassen sind, zur Verfügung. Insbesondere Kombinationen von Ballonkathetern mit medikamentösen Verfahren scheinen eine interessante Option für eine erfolgreiche Geburtseinleitung zu sein. Die Ergebnisse einiger aktuell laufender Studien dürften in den nächsten Jahren hierüber noch genauere Kenntnisse liefern.

### Interessenkonflikt

▼ Sven Kehl: Vortragshonorar, Reisekosten (COOK Medical).

### Literatur

- 1 Huisman CM, Jozwiak M, de Leeuw JW et al. Cervical ripening in the Netherlands: a survey. *Obstet Gynecol Int* 2013; 2013: 745159
- 2 AQUA-Institut für angewandte Qualitätsförderung und Forschung im Gesundheitswesen. Geburtshilfe, Qualitätsreport 2013. Online: <https://www.sgg.de/ergebnisse/leistungsbereiche/geburtshilfe.html>; Stand: 01.05.2015
- 3 Rath W, Pecks U. Medikamentöse Geburtseinleitung. 2. vollst. aktualisierte Aufl. Bremen, London, Boston: Uni-Med; 2010
- 4 Rath W. Misoprostol zur Geburtseinleitung – eine aktuelle Übersicht. *Frauenarzt* 2014; 55: 346–353
- 5 Norman JE, Stock S. Intracervical Foley catheter for induction of labour. *Lancet* 2011; 378: 2054–2055
- 6 Lim CE, Ng RW, Xu K. Non-hormonal methods for induction of labour. *Curr Opin Obstet Gynecol* 2013; 25: 441–447
- 7 Sciscione AC. Methods of cervical ripening and labour induction: mechanical. *Clin Obstet Gynecol* 2014; 57: 369–376
- 8 Wing DA, Lockwood CJ, Barss VA. Techniques for ripening the unfavorable cervix prior to induction. 2014. Online: [www.uptodate.com](http://www.uptodate.com); Stand: 01.05.2015
- 9 Manabe Y, Manabe A, Takahashi A. F prostaglandin levels in amniotic fluid during balloon-induced cervical softening and labor at term. *Prostaglandins* 1982; 23: 247–256
- 10 Lim SY, Kim H, Kim CH et al. The effect of a Foley catheter balloon on cervical ripening. *J Obstet Gynaecol* 2013; 33: 830–838

- 11 Smith JA. Balloon dilators for labour induction: a historical review. *J Med Ethics Hist Med* 2013; 6: 10–14
- 12 Pennell CE, Henderson JJ, O'Neill MJ et al. Induction of labour in nulliparous women with an unfavorable cervix: a randomized trial comparing double and single balloon catheters and PGE<sub>2</sub> gel. *BJOG* 2009; 116: 1443–1452
- 13 Solt I, Ben-Harush S, Kaminsky S et al. A prospective randomized study comparing induction of labour with the foley catheter and the cervical ripening double catheter in nulliparous and multiparous women. *AJOG* 2008; 201 (Suppl. 1): S124
- 14 Salim R, Zafran N, Nachum Z et al. Single-balloon compared with double-balloon catheters for induction of labour. *Obstet Gynecol* 2011; 118: 79–86
- 15 Mei-Dan E, Walfisch A, Suarez-Easton S et al. Comparison of two mechanical devices for cervical ripening: a prospective quasi-randomized trial. *J Matern Fetal Neonatal Med* 2012; 25: 723–727
- 16 Mei-Dan E, Walfisch A, Valencia C et al. Making cervical ripening EASI: a prospective controlled comparison of single versus double balloon catheters. *J Matern Fetal Neonatal Med* 2014; 27: 1765–1770
- 17 Delaney S, Shaffer BL, Cheng YW et al. Labor induction with a foley balloon inflated to 30 ml compared with 60 ml: a randomized trial. *Obstet Gynecol* 2010; 115: 1239–1245
- 18 Levy R, Kanengiser B, Furman B et al. A randomized trial comparing a 30 ml and a 80 ml Foley catheter balloon for preinduction cervical ripening. *AJOG* 2004; 191: 1632–1636
- 19 Kashanian M, Akbarian AR, Fekrat M. Cervical ripening and induction of labour with intravaginal misoprostol and foley catheter cervical traction. *Int J Gynecol Obstet* 2006; 92: 79–80
- 20 Berndt A, El-Chaar D, Murphy K et al. Does cervical ripening at term using a high volume foley catheter result in a lower caesarean section rate than a low volume foley catheter? A systematic review and meta-analysis. *J Obstet Gynaecol Can* 2014; 36: 678–687
- 21 Lutgendorf MA, Johnson A, Terpstra ER et al. Extra-amniotic balloon for preinduction cervical ripening: a randomized comparison of weighted traction versus unweighted. *J Matern Fetal Neonatal Med* 2012; 25: 581–586
- 22 MacKeen AD, Walker LT, Ruhstaller K et al. Foley catheter vs. prostaglandin as ripening agent in pregnant women with premature rupture of membranes. *Am Osteopath Assoc* 2014; 114: 686–692
- 23 Cabrera IB, Quinones JN, Durie DE et al. Intracervical balloon placement and the risk of chorioamnionitis in term rupture of membranes. *Obstet Gynecol* 2014; 123 (Suppl.): S43
- 24 FOLCROM Trial: Foley Catheter in Rupture of Membranes. Online: <https://mytomorrow.com/program/folcrom-trial-foley-catheter-in-rupture-of-membranes>; <http://clinicaltrials.gov/ct2/show/NCT01973036>; Stand: 01.05.2015
- 25 Heinemann J, Gillen G, Sanchez-Ramos L et al. Do mechanical methods of cervical ripening increase infectious morbidity? A systematic review. *AJOG* 2008; 199: 177–187
- 26 Jozwiak M, Bloemenkamp KW, Kelly AJ et al. Mechanical methods for induction of labour. *Cochrane Database Syst Rev* 2012; 3: CD001233
- 27 van Halem K, Bakker JHJ, Verhoeven CJ et al. Does use of an intrauterine catheter during labour increase risk of infection? *J Matern Fetal Neonatal Med* 2012; 25: 415–418
- 28 Jozwiak M, Oude Rengerink KO, Benthem M et al. Foley catheter versus vaginal prostaglandin E<sub>2</sub> gel for induction of labour at term (PROBAAT trial): an open-label randomised controlled trial. *Lancet* 2011; 378: 2095–2103
- 29 Rouse DJ, Weiner SJ, Bloom SL et al. Failed labor induction. *Obstet Gynecol* 2011; 117: 267–272
- 30 Talaulikar VS, Arulkaran S. Failed induction of labor: strategies to improve the success rate. *Obstet Gynecol Surv* 2011; 66: 717–728
- 31 Mazhar SB, Jabeen K. Outcome of mechanical mode of induction in failed primary labour induction. *J Coll Physicians Surg Pak* 2005; 15: 616–619
- 32 Caliskan E, Dilbaz I, Gelisen O et al. Unsuccessful labour induction in women with unfavourable cervical scores: predictors and management. *Austr NZJ Obstet Gynecol* 2004; 44: 262–267
- 33 Fox NS, Saltzman DH, Roman AS et al. Intravaginal misoprostol versus Foley catheter for labour induction: a meta-analysis. *BJOG* 2011; 118: 647–654
- 34 Mozurkewich EL, Chilimigras JL, Berman DB et al. Methods of induction of labour: a systematic review. *BMC Pregnancy Childbirth* 2011; 11: 84–103
- 35 Shechter-Maor G, Haran G, Sadeh-Mestechkin D et al. Intravaginal prostaglandin E<sub>2</sub> versus double-balloon catheter for labor induction in term oligohydramnios. *J Perinat* 2014; DOI: 10.1038/jp.2014.173
- 36 Kehl S, Welzel G, Ehard A et al. Women's acceptance of a double-balloon device as an additional method for inducing labour. *Eur J Obstet Gynecol Reprod Biol* 2013; 168: 30–35
- 37 Anabusi S, Mei-Dan E, Hallak M et al. Mechanical labor induction in the obese population: a secondary analysis of a prospective randomized trial. *Arch Gynecol Obstet* 2015; DOI: 10.1007/s00404-015-3765-3
- 38 ten Eikelder ML, Neervoort F, Oude Rengerink K et al. Induction of labour with a Foley catheter or oral misoprostol at term: the PROBAAT-II study, a multicentre randomised controlled trial. *BMC Pregnancy Childbirth* 2013; 13: 67–73
- 39 Bracken H, Mundle S, Faragher B et al. Induction of labour in pre-eclamptic women: a randomized trial comparing the Foley balloon catheter with oral misoprostol. *BMC Pregnancy Childbirth* 2014; 14: 308–313
- 40 Jonsson M, Hellgren C, Wiberg-Itzel E et al. Assessment of pain in women randomly allocated to speculum or digital insertion of the Foley catheter for induction of labor. *Acta Obstet Gynecol Scand* 2011; 90: 997–1004
- 41 Cromi A, Ghezzi F, Uccella S et al. A randomized trial of preinduction cervical ripening: dinoprostone vaginal insert versus double-balloon catheter. *AJOG* 2012; 207: 125e1–125e7
- 42 Du C, Liu Y, Liu Y et al. Double-balloon catheter vs. dinoprostone vaginal insert for induction of labor with an unfavorable cervix. *Arch Gynecol Obstet* 2014; DOI: 10.1007/s00404-014-3547-3
- 43 Vaknin Z, Kurzweil Y, Sherman D. Foley catheter balloon vs. locally applied prostaglandins for cervical ripening and labor induction: a systematic review and metaanalysis. *Am J Obstet Gynecol* 2010; 203: 418–429
- 44 Prager M, Grimfors-Eneroth E, Edlund M et al. A randomized controlled trial of intravaginal dinoprostone, intravaginal misoprostol and transcervical balloon catheter for labour induction. *BJOG* 2008; 115: 1443–1450
- 45 Hendersson JJ, Pennell CE, Dickinson JE. Transcervical Foley catheter should be used in preference to intravaginal prostaglandins for induction of labor with an unfavourable cervix. *AJOG* 2011; 205: e19–e20
- 46 van Baaren GJ, Jozwiak M, Opmeer B et al. Cost-effectiveness of induction of labour at term with a Foley catheter compared to vaginal prostaglandin E<sub>2</sub> gel (PROBAAT trial). *BJOG* 2013; 120: 987–995
- 47 Cromi A, Ghezzi F, Agosti M et al. Is transcervical Foley catheter actually slower than prostaglandins in ripening the cervix? A randomized study. *AJOG* 2011; 204: 338e1–338e7
- 48 Suffeool K, Rosenn BM, Kam S et al. Labor induction in nulliparous women with an unfavorable cervix: double-balloon catheter versus dinoprostone. *J Perinat Med* 2014; 42: 213–218
- 49 Gibbins J, Thomson AM. Women's expectations and experiences of childbirth. *Midwives* 2001; 17: 302–313
- 50 Jozwiak M, ten Eikelder M, Rengerink KO et al. Foley catheter versus vaginal misoprostol: randomized controlled trial (PROBAAT-M Study) and systematic review and meta-analysis of literature. *Am J Perinatol* 2014; 31: 145–156
- 51 Abramovici D, Goldwasser S, Mabie BC et al. A randomized comparison of oral misoprostol versus Foley catheter and oxytocin for induction of labor at term. *AJOG* 1999; 181: 1108–1112
- 52 Sheikher C, Suri N, Khali U. Comparative evaluation of oral misoprostol, vaginal misoprostol and intracervical Foley's catheter for induction of labour at term. *JK Science* 2009; 11: 75–77
- 53 Alfirevic Z, Aflaifel N, Weeks A. Oral misoprostol for induction of labour. *Cochrane Database Syst Rev* 2014; 6: CD001338
- 54 Pettiker CM, Pocock SB, Smok DP et al. Transcervical Foley catheter with and without oxytocin for cervical ripening: a randomized controlled trial. *Obstet Gynecol* 2008; 111: 1320–1326
- 55 Fitzpatrick CB, Grotegut C, Bishop TS et al. Cervical ripening with foley balloon plus fixed versus incremental low-dose oxytocin: a randomized controlled trial. *J Matern Fetal Neonatal Med* 2012; 25: 1006–1010
- 56 Walfisch A, Mei-Dan E, Hallak M. Trans-cervical double balloon catheter with and without extra-amniotic saline infusion for cervical ripening: a prospective quasi-randomized trial. *J Matern Fetal Neonatal Med* 2015; 28: 846–853
- 57 Kehl S, Ehard A, Berlitz S et al. Combination of misoprostol and mechanical dilatation for induction of labour: a randomized controlled trial. *Eur J Obstet Gynecol Reprod Biol* 2011; 159: 315–319

- 58 Carbone JF, Tuuli MG, Fogerty PJ et al. Combination of Foley balloon and vaginal misoprostol compared with vaginal misoprostol alone for cervical ripening and labor induction – a randomized controlled trial. *Obstet Gynecol* 2013; 121: 247–252
- 59 Ugwu EO, Onah HE, Obi SN et al. Effect of the Foley catheter and synchronous low dose misoprostol administration on cervical ripening: a randomised controlled trial. *J Obstet Gynaecol* 2013; 33: 572–577
- 60 Lanka S, Surapaneni T, Nirmalan PK. Concurrent use of Foley catheter and misoprostol for induction of labor: a randomized clinical trial of efficacy and safety. *Obstet Gynaecol Res* 2014; 40: 1527–1533
- 61 Ande AB, Ezeanochie CM, Olagbuji NB. Induction of labor prolonged pregnancy with unfavorable cervix: comparison of sequential intracervical Foley catheter-intravaginal misoprostol and intravaginal misoprostol alone. *Arch Gynecol Obstet* 2012; 285: 967–971
- 62 Kehl S, Ziegler J, Schleussner E et al. Sequential use of double-balloon catheter and oral misoprostol versus oral misoprostol alone for induction of labour at term (CRBplus trial): a multicentre, open-label randomised controlled trial. *BJOG* 2015; 122: 129–136
- 63 WHO recommendations for induction of labour. Online: <http://whqlibdoc.who.int/hq/2011/Stand: 01.05.2015>
- 64 Royal College of Obstetricians and Gynaecologists. Induction of labour 2008 (update 2013). NICE Clinical Guideline 70. Online: [www.nice.org.uk/guidance/cg70](http://www.nice.org.uk/guidance/cg70); Stand: 01.05.2015
- 65 ACOG Committee on Practice Bulletins – Obstetrics. ACOG Practice Bulletin No. 107: Induction of labour. *Obstet Gynecol* 2009; 114 (2 Pt 1): 386–397
- 66 Leduc D, Biringier A, Lee L et al. SOGC Clinical Practice Guideline No. 296. Induction of Labour. *J Obstet Gynaecol Can* 2013; 35: S1–S17
